# Supplementary material for: Genome-Wide Identification, Characterization, and Expression Analysis of the BES1 Family Genes under Abiotic Stresses in Phoebe bournei
Source: MDPI journal article supplement (doi:10.3390/ijms25053072), 2024-03-06
Supplement: s1 [file s1]

**Table S1.** The expression of the 9 *PbBES1* genes in various tissues, including root bark, root xylem, stem bark, stem xylem, and leaf.

**Table S2.** Information of primers.
