# Supplementary material for: Genome-Wide Identification, Characterization, and Expression Analysis of the BES1 Family Genes under Abiotic Stresses in Phoebe bournei
Source: Int J Mol Sci. 2024 Mar 6;25(5):3072. doi: 10.3390/ijms25053072 (PMC10932303; doi:10.3390/ijms25053072)
Supplement: Supplementary file 1 [file ijms-25-03072-s001.zip › Table S1.xlsx]

## Sheet: Sheet1
Gene ID	rename	root bark	root xylem	stem bark	stem xylem	Leaf
OF24935	PbBES1.1	54.9017	20.6971	50.7255	22.8685	4.18638
OF27116	PbBES1.2	270.198	140.989	187.829	108.005	9.71591
OF22287	PbBES1.3	56.7254	65.8855	18.254	31.2569	17.7733
OF00818	PbBES1.4	51.5808	39.7213	23.5108	28.9895	12.1419
OF17992	PbBES1.5	32.7913	24.2919	35.8295	22.441	34.6395
OF26590	PbBES1.6	8.99549	6.06548	10.6619	5.60639	6.2129
OF15430	PbBES1.7	0.03224	5.41707	0	0.259833	0.0994127
OF27620	PbBES1.8	3.28547	2.14003	5.11551	1.44999	5.48619
OF24842	PbBES1.9	2.54793	1.95176	3.46975	1.5144	6.44666
