# Supplementary material for: Genome-Wide Identification, Characterization, and Expression Analysis of the BES1 Family Genes under Abiotic Stresses in Phoebe bournei
Source: Int J Mol Sci. 2024 Mar 6;25(5):3072. doi: 10.3390/ijms25053072 (PMC10932303; doi:10.3390/ijms25053072)
Supplement: Supplementary file 1 [file ijms-25-03072-s001.zip › Table S2.xlsx]

## Sheet: Sheet1
Gene name	Forward primer(5’-3’)	Reverse primer(5’-3’)
PbBES1.1	AGCTCCCCTACAGCACGA	ACGACCAGGGCTAGGAGG
PbBES1.2	CCGTCAGGTCCTCCCAGA	GGTGTCCACATGGGCTCC
PbBES1.3	AACGGGAGGAGGAGGGTC	TGCGATTGCCCTCCTTCG
PbBES1.4	CCGGAACCTCGCCACAAT	TGGGGGAGGATAACGGGG
PbBES1.5	AACGTTCTGTCCCTGGCG	GTATCCGGCCGTGAGCTC
PbEF1α	GCTCCTGGTCACCGTGAC	TCACGAGTTTGCCCGTCC
